# Supplementary material for: Notch-1 Confers Chemoresistance in Lung Adenocarcinoma to Taxanes through AP-1/microRNA-451 Mediated Regulation of MDR-1
Source: PubMed Central journal article supplement — Mol Ther Nucleic Acids. 2016 Oct 11;5(10):e375–. doi: 10.1038/mtna.2016.82 (PMC5095685; doi:10.1038/mtna.2016.82), 2016-10-11
Supplement: mtna201682x1.pdf [file mtna201682x1.pdf]

**Figure S1.** The effects of Notch inhibitor DAPT on cells.

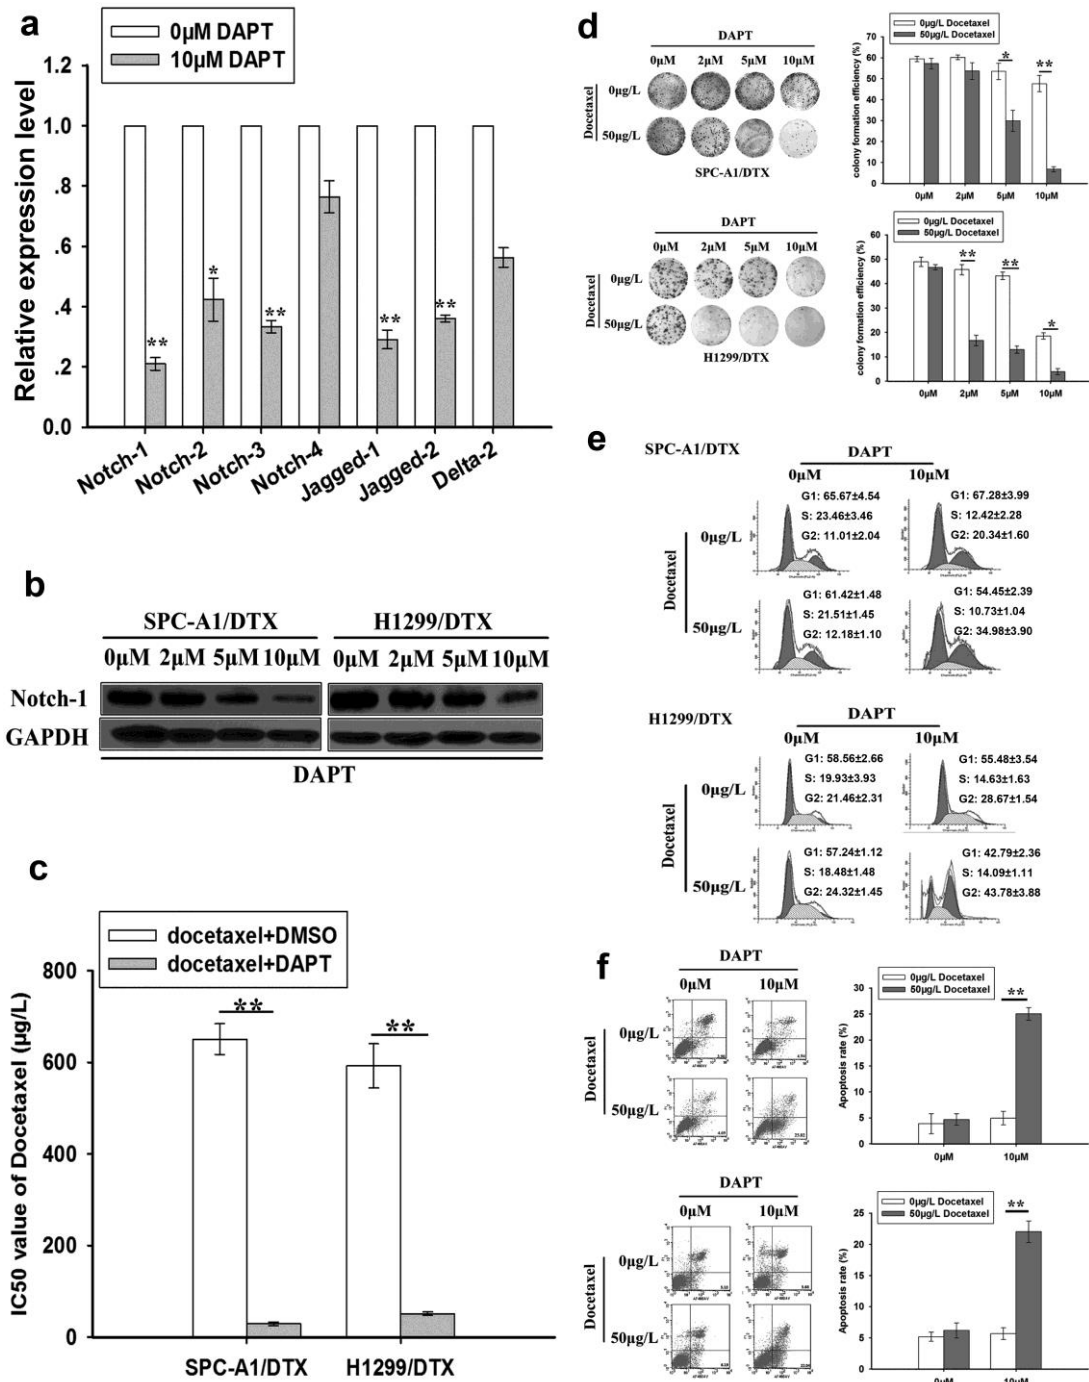

**Figure S1.** (a) DAPT decreases the expression of each receptor or ligand in Notch signaling pathway. (b) Protein levels of Notch-1 in two DTX-resistant cell lines treated with DAPT in different concentration (0, 2, 5 or 10μM). (c) The IC50 value of

DTX in two DTX-resistant cell lines treated with 10 $\mu$ M DAPT or not. **(d)** Colony formation assay in two DTX-resistant cell lines treated with 50 $\mu$ g/L DTX combining with DAPT in different concentrations (0, 2, 5 or 10 $\mu$ M). **(e)** Cell cycle analysis and **(f)** Cell apoptosis analysis in two DTX-resistant cell lines treated with 50 $\mu$ g/L DTX, 10 $\mu$ M DAPT or 50 $\mu$ g/L DTX combined with 10 $\mu$ M DAPT. \*P<0.05 and \*\*P<0.01.

**Figure S2.** The effects of Notch-1 overexpression on cells.

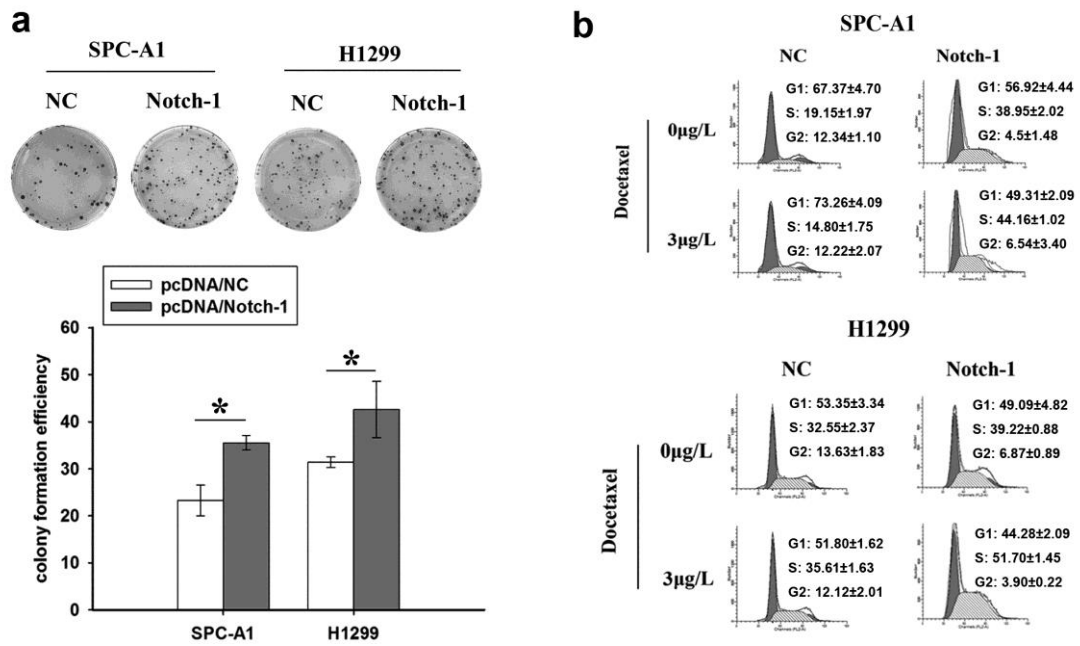

**Figure S2.** (a) Colony formation assay in two parental LAD cell lines with transfection of Notch-1 overexpression plasmid (pcDNA3/Notch-1). (b) Cell cycle analysis in two parental LAD cell lines with transfection of Notch-1 overexpression plasmid (pcDNA3/Notch-1) treated with 3µg/L Docetaxel. \* $P < 0.05$

**Figure S3.** DAPT sensitizes DTX-resistant LAD cells to DTX in vivo.

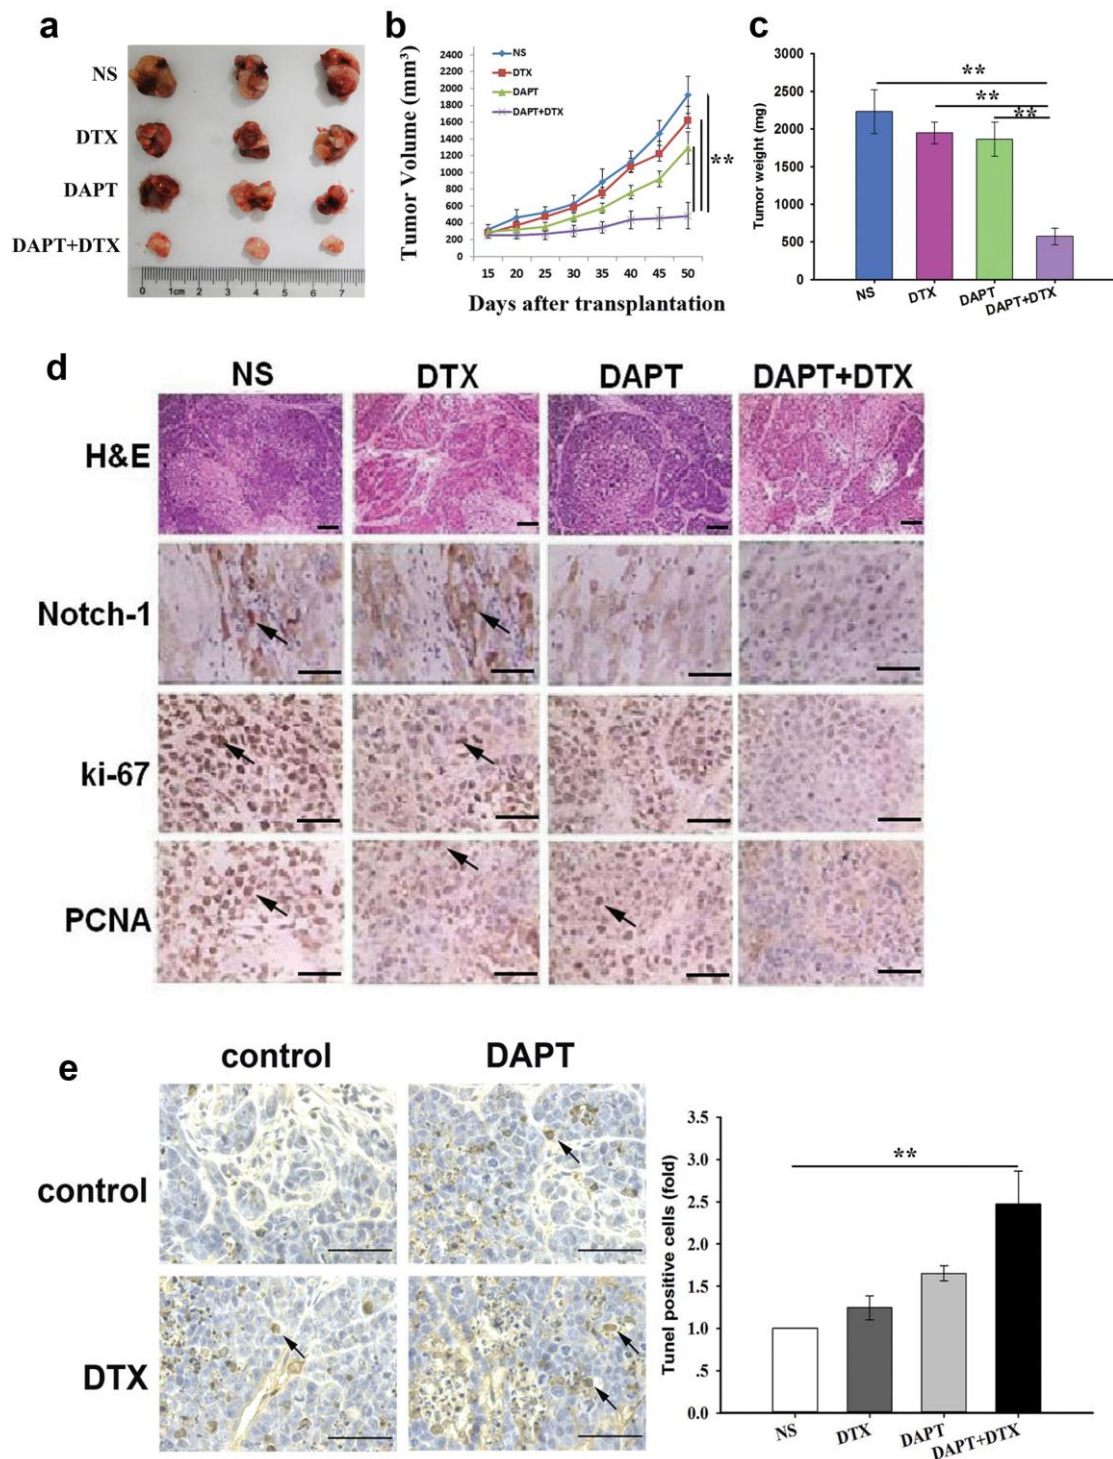

**Figure S3.** (a) The xenograft tumors were obtained and measured. (b) The values of tumor volume after transplantation. (c) The tumor weight of different treated xenograft tumors models. (d) The immunohistochemistry staining of ki-67, Notch-1

and PCNA in tumor samples from the different treated xenograft tumors models. (e)

TUNEL staining in tumor samples from the different treated xenograft tumors models.

Bar=50 $\mu$ m. \*\*P<0.01.

**Figure S4.** The effects of miR-451 on cells.

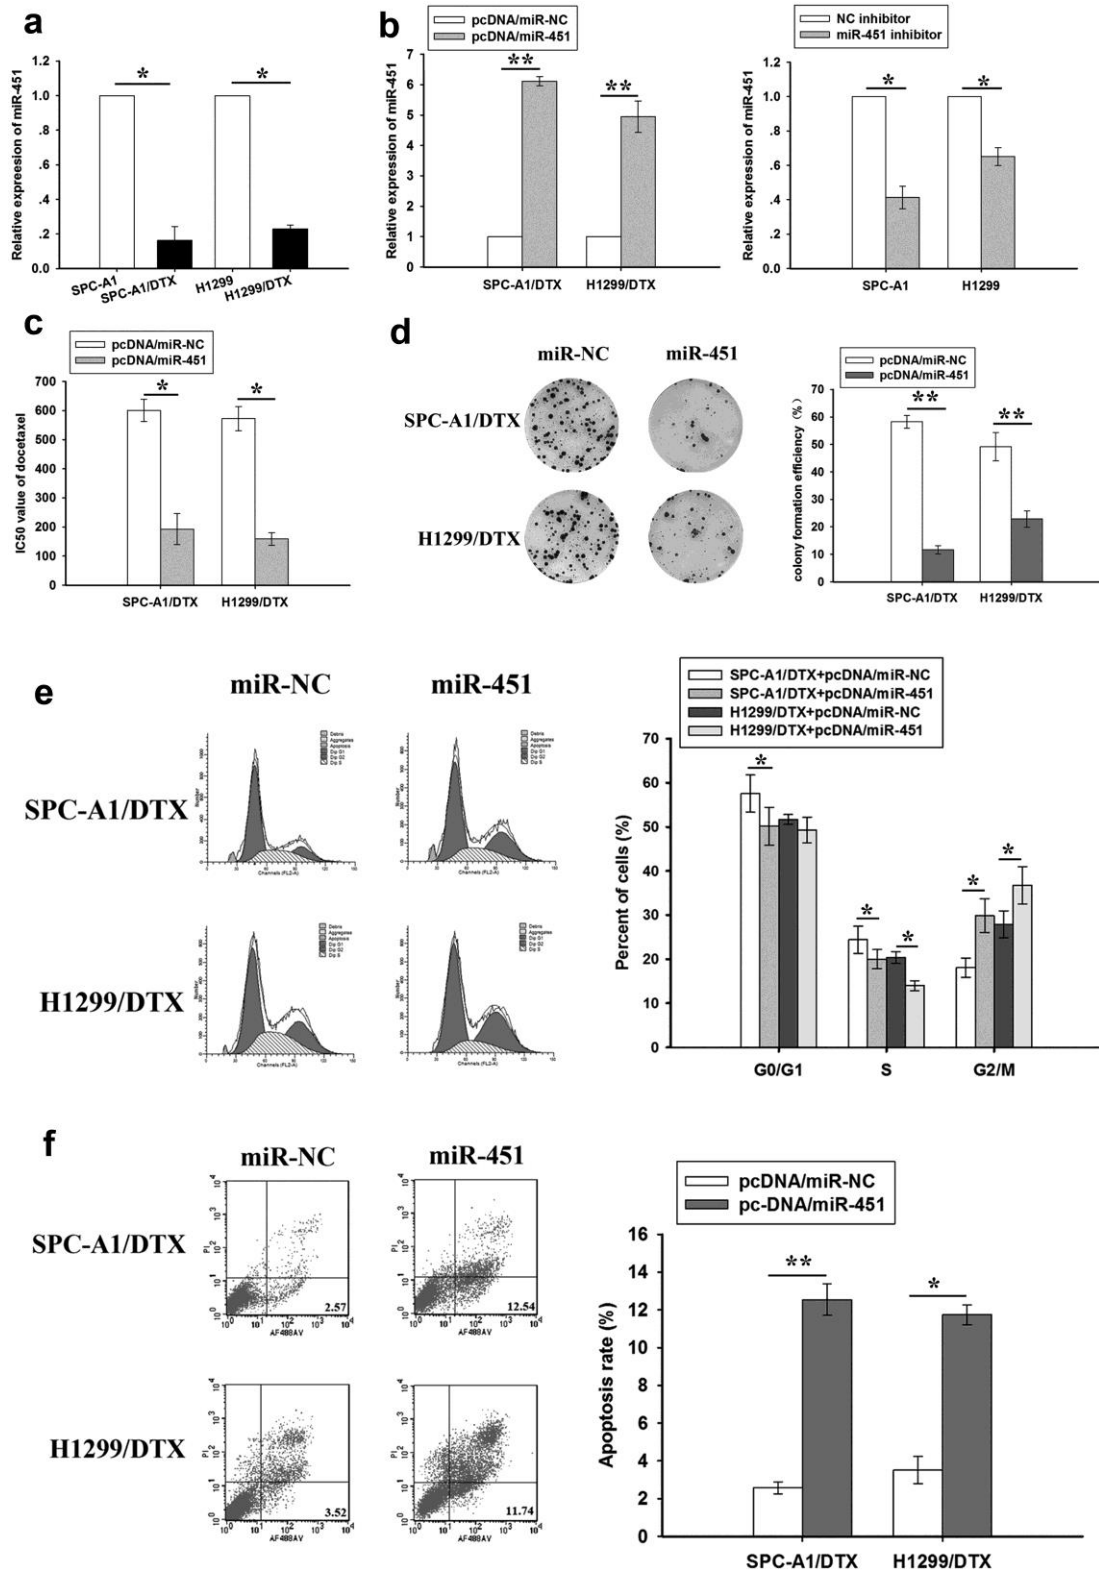

**Figure S4.** (a) The expression of miR-451 in in two parental LAD cell lines and their docetaxel-resistant cell lines. (b) The expression of miR-451 in in two parental LAD

cell lines treated with miR-451 inhibitor and their docetaxel-resistant cell lines with transfection of miR-451 overexpression plasmid (pcDNA/miR-451). (c) The IC<sub>50</sub> value of Docetaxel in two docetaxel-resistant cell lines with transfection of miR-451 overexpression plasmid (pcDNA/miR-451). (d) Colony formation assay in two docetaxel-resistant cell lines with transfection of miR-451 overexpression plasmid (pcDNA/miR-451). (e) Cell cycle analysis and (f) Cell apoptosis analysis in two docetaxel-resistant cell lines with transfection of miR-451 overexpression plasmid (pcDNA/miR-451). \* $P < 0.05$  and \*\* $P < 0.01$ .

**Table S1:** Primers sequences used in our research.

| Name                    | Sequences                                                                                                                                    |
|-------------------------|----------------------------------------------------------------------------------------------------------------------------------------------|
| sh-control              | 5'-CACCGTTCTCCGAACGTGTCACGTCAAGAGATTACGTGACACGTTCCGGAGAATTTTTTG-3'<br>5'-GATCCAAAAAATTCTCCGAACGTGTCACGTAATCTCTTGACGTGACACGTTCCGGAGACC-3'     |
| sh-Notch-1              | 5'-CACCGAAGTGTCTGAGGCCAGCAAGATCAAGAGATCTTGCTGGCCTCAGACACTTTTTTTTG-3'<br>5'-GATCCAAAAAAAAGTGTCTGAGGCCAGCAAGATCTCTGAATCTTGCTGGCCTCAGACACTTC-3' |
| NC inhibitor            | 5'-CAGUACUUUGUGUAGUACAA-3'                                                                                                                   |
| miR-451 inhibitor       | 5'-AACUCAGUAAUGGUAACGGUUU-3'                                                                                                                 |
| NC mimics               | F 5'-UUCUCCGAACGUGUCACGUTT-3'<br>R 5'-ACGUGACACGUUCGGAGAATT-3'                                                                               |
| miR-451 mimics          | F 5'-AAACCGUUACCAUUACUGAGUU-3'<br>R 5'-CUCAGUAAUGGUAACGGUUUUU-3'                                                                             |
| c-Jun                   | F: GTCCGGACTCAGATCTCGAGCTATGACTGCAAAGATGGAAAC<br>R: TATCTAGATCCGGTGGATCCTCAAATGTTTGCAACTGCTGC                                                |
| <b>miR-451 promoter</b> |                                                                                                                                              |
| R1 136-427bp            | F 5'-ATGGCTTGAAAAGCACTGTGA-3'<br>R 5'-TCCAGGTAAGTGCACCTTCTC-3'                                                                               |
| R2 402-705bp            | F 5'-GAGAAGGTGCACTTACCTGGA-3'<br>R 5'-AATTAAATGCTGGTGGATGGG-3'                                                                               |
| R3 685-986bp            | F 5'-CCCATCCACCAGCATTTAATT-3'<br>R 5'-TCCTAGTAGAGCAACCCCAA-3'                                                                                |
| R4 957-1273bp           | F 5'-TTGGGGTTGCTCTACTAGGA-3'<br>R 5'-TGTGACCTCAGGAAATAGAAC-3'                                                                                |
| R5 1252-1548bp          | F 5'-GTTCTATTTCTGAGGCACA-3'<br>R 5'-TGGCGAAACCCATCTCCACT-3'                                                                                  |
| R6 1532-1829bp          | F 5'-AGTGGAGATGGGGTTTCGCCA-3'<br>R 5'-AGATTATGCTACTGTACTCCA-3'                                                                               |
| R7 1820-2104bp          | F 5'-TGGAGTACAGTAGCATAATCT-3'<br>R 5'-CTTGATGTAGGCTGGAACATT-3'                                                                               |
| R8 2096-2402bp          | F 5'-AATGTTCCAGCCTACATCAAG-3'<br>R 5'-TTCTTGCAATGGTCCCAGGTG-3'                                                                               |
| R9 2392-2706bp          | F 5'-CACCTGGGACCATTGCAAGAA-3'<br>R 5'-TTGTCCCAAGTCACACAGTTT-3'                                                                               |
| R10 2697-3005bp         | F 5'-AAACTGTGTGACTGGGGACAA-3'<br>R 5'-TACAATCGTGAGCCACCATG-3'                                                                                |



**Table S2.** Primers used in Quantitative Real-Time Polymerase Chain Reaction (q-PCR).

| <b>Name</b>     | <b>Primer</b>                                                                                |
|-----------------|----------------------------------------------------------------------------------------------|
| <b>Notch-1</b>  | <b>F:</b> 5'-CCGTCATCTCCGACTTCATCT-3'<br><b>R:</b> 5'-GTGTCTCCTCCCTGTTGTTCTG-3'              |
| <b>Notch-2</b>  | <b>F:</b> 5'-CCCAATGGGCAAGAAGTCTA-3'<br><b>R:</b> 5'-CACAATGTGGTGGTGGGATA-3'                 |
| <b>Notch-3</b>  | <b>F:</b> 5'-TCTTGCTGCTGGTCATTCTC-3'<br><b>R:</b> 5'-TGCCTCATCCTCTTCAGTTG-3'                 |
| <b>Notch-4</b>  | <b>F:</b> 5'-CACTGAGCCAAGGCATAGAC-3'<br><b>R:</b> 5'-ATCTCCACCTCACACCACTG-3'                 |
| <b>Jagged-1</b> | <b>F:</b> 5'-AATGGTTATCGCTGTATCTG-3'<br><b>R:</b> 5'-ACTGTTTCGGGCTATGTT-3'                   |
| <b>Jagged-2</b> | <b>F:</b> 5'-GATTGGCGGCTATTACTGTG-3'<br><b>R:</b> 5'-AGGCAGTCGTCAATGTTCTC-3'                 |
| <b>Delta-1</b>  | <b>F:</b> 5'-AGACGGAGACCATGAACAAC-3'<br><b>R:</b> 5'-AGATGCTTCTCCACCCCTGA-3'                 |
| <b>MDR-1</b>    | <b>F:</b> 5'-CCCATCATTGCA ATAGCAGG-3'<br><b>R:</b> 5'-TGTTCAAACCTTCTGCTCCTGA-3'              |
| <b>miR-451</b>  | <b>F:</b> 5'-ACACTCCAGCTGGGAAACCGTTACCATTA -3'<br><b>R:</b> 5'-TGGTGTCGTGGAGTCG-3'           |
| <b>miR-200b</b> | <b>F:</b> 5'-GTGGAGGGTCCGAGGTATTC-3'<br><b>R:</b> 5'-CGTAATACTGCCTGGTAATGATG-3'              |
| <b>miR-100</b>  | <b>F:</b> 5'-GCGGCAACCCGTAGATCCGAA-3'<br><b>R:</b> 5'-GTGCAGGGTCCGAGGT-3'                    |
| <b>Let-7c</b>   | <b>F:</b> 5'-CGCTCGAGCAGAGCTGTTTATGGCC-3'<br><b>R:</b> 5'-GCGGATCCGCCTGGCCAGGCAGG-3'         |
| <b>miR-650</b>  | <b>F:</b> 5'-CGCTCGAGAGTGGGCAGAGGAATGCCTG-3'<br><b>R:</b> 5'-GCGGATCCGAAGAGGTCTGGGGGACTGC-3' |
| <b>U6</b>       | <b>F:</b> 5'-CTCGCTTCGGCAGCACA-3'<br><b>R:</b> 5'-AACGCTTCACGAATTTGCGT-3'                    |
| <b>GAPDH</b>    | <b>F:</b> 5'-TGGGTGTGAACCATGAGAAGT-3'<br><b>R:</b> 5'-TGAGTCCTTCCACGATACCAA-3'               |
